# Supplementary material for: Design, Evolution, and Evaluation of a General Chemistry-Bridging Course
Source: MDPI journal article supplement (doi:10.3390/educsci13090891), 2023-09-03
Supplement: s1 [file s1]

Supporting Information for

**Design, Evolution, and Evaluation of a General Chemistry Bridge Course**

| <b>Table of Contents</b>                                                                          |             |
|---------------------------------------------------------------------------------------------------|-------------|
| <b>Item Description</b>                                                                           | <b>Page</b> |
| <b>Figure S1.</b><br>Announcement flyer for the bridge course.                                    | 2           |
| <b>Table S1.</b><br>Schedule of activities for the bridge course, F2016 implementation.           | 3           |
| <b>Table S2.</b><br>Schedule of activities for the bridge course, F2018 implementation.           | 4           |
| <b>Table S3.</b><br>Schedule of activities for the online version of the bridge course.           | 5           |
| <b>Examples.</b><br>Detailed examples of activities using in the bridge course.                   | 6-12        |
| <b>Module Worksheets for Online Implementation.</b><br>Detailed worksheets for each online module | 13-20       |



**Figure S1.** Flyer for the bridge course.

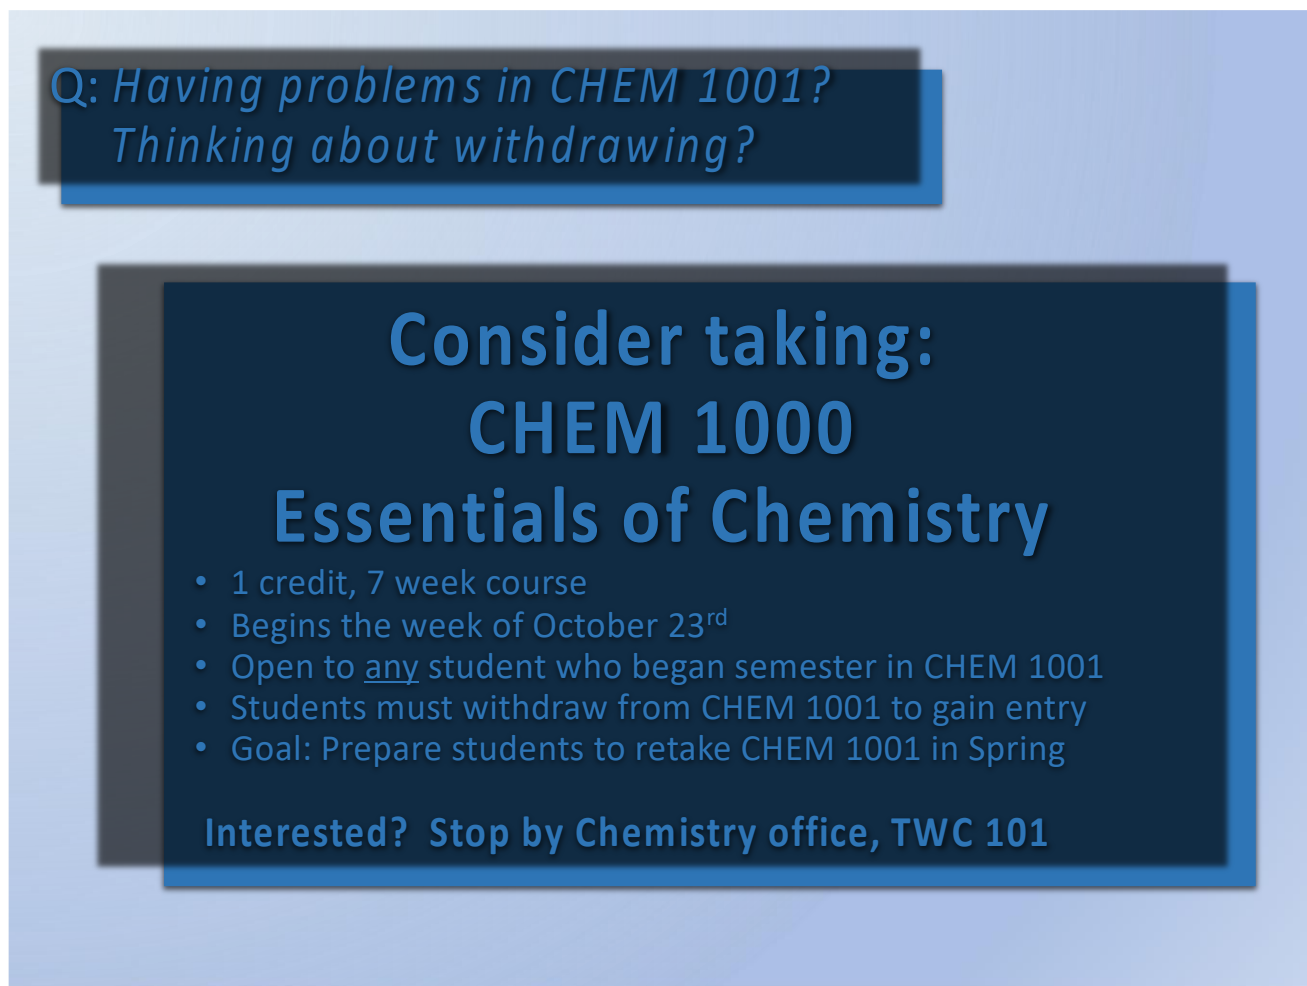The flyer is a blue rectangular graphic with a lighter blue background. It features two main text boxes. The top box is dark blue with white italicized text asking about problems in CHEM 1001 and withdrawing. The bottom box is a larger dark blue rectangle with white text. It starts with 'Consider taking: CHEM 1000 Essentials of Chemistry' in large, bold letters. Below this is a bulleted list of five points: 1 credit, 7 week course; begins the week of October 23rd; open to any student who began semester in CHEM 1001; students must withdraw from CHEM 1001 to gain entry; and the goal is to prepare students to retake CHEM 1001 in Spring. At the bottom of this box, it says 'Interested? Stop by Chemistry office, TWC 101' in bold white text.

*Q: Having problems in CHEM 1001?  
Thinking about withdrawing?*

**Consider taking:  
CHEM 1000  
Essentials of Chemistry**

- 1 credit, 7 week course
- Begins the week of October 23<sup>rd</sup>
- Open to any student who began semester in CHEM 1001
- Students must withdraw from CHEM 1001 to gain entry
- Goal: Prepare students to retake CHEM 1001 in Spring

**Interested? Stop by Chemistry office, TWC 101**



**Table S1.** Bridge course activities in the initial offering (F2016).

| Week         | Activities                                                                                                                                                                                                                          |
|--------------|-------------------------------------------------------------------------------------------------------------------------------------------------------------------------------------------------------------------------------------|
| 1<br>Oct. 28 | <ul style="list-style-type: none"><li>• Course Syllabus/Schedule</li><li>• Scientific Reasoning and the Art of Deduction: Periodic Trends</li><li>• Concept Mapping: Using the Concept Map in Chemistry</li></ul>                   |
| 2<br>Nov. 4  | <ul style="list-style-type: none"><li>• Asking Questions = Active Learning</li><li>• Strategy for Formulating Good Questions</li><li>• Expanding your Scientific Vocabulary</li><li>• Microlecture: Formulating Questions</li></ul> |
| 3<br>Nov. 11 | <ul style="list-style-type: none"><li>• Dimensional Analysis</li><li>• A Case Study in Dimensional Analysis: Taking Avogadro to Court</li><li>• Microlecture: Formulating Questions</li></ul>                                       |
| 4<br>Nov. 18 | <ul style="list-style-type: none"><li>• Thinking like a Chemist: What Element am I?</li><li>• Microlecture: Formulating Questions</li></ul>                                                                                         |
| 5<br>Nov. 25 | CLASS DOES NOT MEET: Thanksgiving Break                                                                                                                                                                                             |
| 6<br>Dec. 1  | <ul style="list-style-type: none"><li>• A Case Study: Chemical Bonding</li><li>• Microlecture: Formulating Questions</li></ul>                                                                                                      |
| 7<br>Dec. 9  | <ul style="list-style-type: none"><li>• Limitations in Chemistry: The Limiting Reagent</li><li>• An exercise in note-taking</li></ul>                                                                                               |



**Table S2.** Bridge course activities in the F2018 offering.

| Week         | Activities                                                                                                                                                                                              |
|--------------|---------------------------------------------------------------------------------------------------------------------------------------------------------------------------------------------------------|
| 1<br>Oct. 26 | <ul style="list-style-type: none"><li>• Course Syllabus/Schedule</li><li>• Electron Configuration and the Structure of the Atom</li><li>• Concept Mapping: Using the Concept Map in Chemistry</li></ul> |
| 2<br>Nov. 2  | <ul style="list-style-type: none"><li>• Thinking like a Chemist: What Element am I?</li><li>• Scientific Reasoning and the Art of Deduction: Periodic Trends</li></ul>                                  |
| 3<br>Nov. 9  | <ul style="list-style-type: none"><li>• Dimensional Analysis and Problem Solving in Chemistry</li><li>• A Case Study in Dimensional Analysis: Taking Avogadro to Court</li></ul>                        |
| 4<br>Nov. 16 | <ul style="list-style-type: none"><li>• Bonding over Questions: Chemical Bonding</li><li>• Asking Questions = Active Learning</li></ul>                                                                 |
| 5<br>Nov. 23 | CLASS DOES NOT MEET: Thanksgiving Break                                                                                                                                                                 |
| 6<br>Nov. 30 | <ul style="list-style-type: none"><li>• Sticking Together in Chemistry</li><li>• Electronegativity and Intermolecular Forces</li></ul>                                                                  |
| 7<br>Dec. 7  | <ul style="list-style-type: none"><li>• Limitations in Chemistry: What is a Limiting Reagent?</li><li>• Taking Notes</li></ul>                                                                          |



**Table S3.** Assignment schedule for the online bridge course.

| Week<br>Module              | Assignment Title                    | Assignment<br>Type | Day                      | Due<br>Dates   |
|-----------------------------|-------------------------------------|--------------------|--------------------------|----------------|
| 0<br>Preparation            | Register for<br>Bubbl               | Website            | Tuesday                  | 12/15          |
| 0<br>Preparation            | Time<br>Management                  | Dropbox            | Monday                   | 12/14          |
| 0<br>Preparation            | Set your<br>Notifications in<br>D2L | D2L Profile        | Before<br>Course<br>Work | NA             |
| 0 Preparation               | Introductions                       | Discussion         | Monday                   | 12/14          |
| 1<br>Air We Breathe         | 1.1<br>Lecture Notes                | Dropbox            | Wednesday                | 12/16          |
| 1<br>Air We Breathe         | 1.2<br>Mind Map                     | Discussion         | Wednesday<br>Sunday      | 12/16<br>12/20 |
| 1<br>Air We Breathe         | 1.3<br>Case Study                   | Dropbox            | Sunday                   | 12/20          |
| 1<br>Air We Breathe         | 1.4<br>Quiz                         | Quiz               | Sunday                   | 12/20          |
| 2<br>Elements and Earth     | 2.1<br>Lecture Notes                | Dropbox            | Sunday                   | 12/27          |
| 2<br>Elements and Earth     | 2.2<br>Mind Map                     | Discussion         | Sunday<br>Sunday         | 12/27<br>1/3   |
| 2<br>Elements and Earth     | 2.3<br>Case Study                   | Dropbox            | Sunday                   | 1/3            |
| 2<br>Elements and Earth     | 2.4<br>Quiz                         | Quiz               | Sunday                   | 1/3            |
| 3 Fire and Flame            | 3.1<br>Lecture Notes                | Dropbox            | Sunday                   | 1/10           |
| 3<br>Fire and Flame         | 3.2<br>Mind Map                     | Discussion         | Sunday<br>Sunday         | 1/10<br>1/17   |
| 3<br>Fire and Flame         | 3.3<br>Quiz                         | Quiz               | Sunday                   | 1/17           |
| 4<br>Water: Solvent of Life | 4.1<br>Lecture Notes                | Dropbox            | Wednesday                | 1/20           |
| 4<br>Water: Solvent of Life | 4.2<br>Mind Map                     | Discussion         | Wednesday<br>Sunday      | 1/20<br>1/24   |
| 4<br>Water: Solvent of Life | 4.3<br>Quiz                         | Quiz               | Sunday                   | 1/24           |



## Example Activities



# CHEM 1000 Week 1

- Activities for Week 1:
  - ✓ Developing a Concept Map of Electron Configuration
  - ✓ Understanding Periodic Trends
    - ✓ Atomic Radius
    - ✓ Ionization energy
    - ✓ Electron Affinity

CHEM 1000 Week 1

1

# Concept Map of Electron Configuration

- Central concept:
  - Electron Configuration of Atoms**
- Associated Concepts...
  - ✓
  - ✓
  - ✓
  - ✓
  - ✓
  - ✓

**STOP!** Try this before proceeding

2

# Concept Map of Electron Configuration

- Central concept:
  - Electron Configuration**
- Associated Concepts...
  - ✓ Quantum numbers
  - ✓  $n, l, m_l, m_s$
  - ✓ Orbitals
  - ✓ s, p, d, ... types of orbitals
  - ✓ Pauli Exclusion Principle
  - ✓ Aufbau principle
  - ✓ Valence electrons

3

# Concept Map of Electron Configuration

**Electron Configuration**

- Ordering of electrons among **Orbitals**
  - Determined by:
    - Aufbau Principle**
    - Pauli Exclusion Principle**: No two electrons have same set of  $n, l, m_l, m_s$
    - Valence electrons** (outermost occupied shell)
- Defined by **Quantum Numbers**
  - $n$ : 1, 2, ...
  - $l$ : 0, 1, 2, ...,  $n-1$
  - $m_l$ :  $0, \pm 1, \pm 2, \dots, \pm l$
  - $m_s$ :  $\pm \frac{1}{2}$

Different types of orbitals: s, p, d

Orbital capacities: s (2), p (6), d (10)

Quantum number ranges:  $m_l$  for s (0), p (-1, 0, 1), d (-2, -1, 0, 1, 2)

4



## CHEM 1000 Week 2

- Activities for Week 2:
  - ✓ What Element Am I?
  - ✓ Understanding Periodic Trends

CHEM 1000 Week 2

1

## What Element Am I?

- This activity focuses on identifying elements in the periodic table from their key properties...
- I will give clues one by one
- For each clue, provide a statement of conclusion or reasoning - i.e., what information can you draw from that clue?
- The point is to try and identify each element using the minimum number of clues
- Let's get started...

CHEM 1000 Week 2

2

## Element 1

**Clue 1:** I am a non-metal.

**Clue 2:** I belong to the Halogen family.

**Clue 3:** I am not the largest nor smallest atom in my group.

**Clue 4:** My first ionization energy is greater than that of my group member Iodine.

**Clue 5:** At room temperature I am not a gas.

# What element am I?

CHEM 1000 Week 2

3

## Element 1 is... Bromine!

- Bromine is a chemical element with symbol Br and atomic number 35. It is the third-lightest halogen, and is a fuming red-brown liquid at room temperature that evaporates readily to form a similarly coloured gas.
- Symbol: Br
- Electron configuration:  $[\text{Ar}]3d^{10}4s^24p^5$
- Atomic number: 35
- Atomic mass:  $79.904 \text{ u} \pm 0.001 \text{ u}$
- Electronegativity: 2.96
- Melting point:  $19.04^\circ \text{ F} (7.2^\circ \text{ C})$
- Boiling point:  $137.8^\circ \text{ F} (58.8^\circ \text{ C})$



CHEM 1000 Week 2

4

## Element 2

**Clue 1:** I am a metal.

**Clue 2:** I am a transition metal.

**Clue 3:** I have the smallest atomic radius in my group.

**Clue 4:** I have 6 valence electrons

# What element am I?

CHEM 1000 Week 2

5

## Element 2 is... Chromium!

- Chromium is a chemical element with symbol Cr and atomic number 24. It is the first element in Group 6. It is a steel-grey, lustrous, hard and brittle metal which takes a high polish, resists tarnishing, and has a high melting point.
- Symbol: Cr
- Electron configuration:  $[\text{Ar}]3d^54s^1$
- Atomic number: 24
- Atomic mass:  $51.9961 \text{ u} \pm 0.0006 \text{ u}$
- Discovered: 1797
- Melting point:  $3,465^\circ \text{ F} (1,907^\circ \text{ C})$



CHEM 1000 Week 2

6



**CHEM 1000 Week 3:  
Dissecting Dimensional Analysis**

- Questions and issues to be addressed:
  - ✓ *Dimensional Analysis: Following the Units*
  - ✓ *A case study: Taking Avogadro to Court*

CHEM 1000: Week 3

1

**Taking Avogadro to Court... A Case Study**

- Based on assignment a Professor gave to introductory computer class
- Assignment was to determine the cost of a single aluminum atom in a roll of aluminum foil...
- ... given the following information
  - Cost and size of the roll
  - Atomic mass of aluminum
  - Avogadro's number
- The assignment led to a revolt, and two students actually sued for a refund of their tuition
- Let's explore the case and assignment....

CHEM 1000: Week 3

2

**The assignment**

- Using dimensional analysis, determine the cost of a single aluminum atom in a roll of aluminum foil...
- ... given the following information
  - Cost and size of the roll
  - Physical properties of aluminum
  - Avogadro's number
- You can make measurements as you see fit!
- Let's get started....

3

**Step 1: Set up your starting point**

- Determine the cost of a single aluminum atom in a roll of aluminum foil given the following information
  - Cost and size of the roll
    - \$24.49 for roll of size 12" x 500'
  - Physical properties of aluminum
    - Atomic mass = 26.98 g/mol
  - Avogadro's number
    - $NA = 6.022 \times 10^{23}$  atoms/mol

$\frac{\$24.49}{1 \text{ roll}}$ 


CHEM 1000: Week 3

4

**Step 2: Set up your ending point**

- Determine the cost of a single aluminum atom in a roll of aluminum foil given the following information
  - Cost and size of the roll
    - \$24.49 for roll of size 12" x 500'
  - Physical properties of aluminum
    - Atomic mass = 26.98 g/mol
  - Avogadro's number
    - $NA = 6.022 \times 10^{23}$  atoms/mol

$\frac{\$24.49}{1 \text{ roll Al}}$ 
 $\frac{\$0.XXX}{1 \text{ atom}}$

CHEM 1000: Week 3

5

**Step 3: Set up your conversions**

- Determine the cost of a single aluminum atom in a roll of aluminum foil given the following information
  - Cost and size of the roll
    - \$24.49 for roll of size 12" x 500'
  - Physical properties of aluminum
    - Atomic mass = 26.98 g/mol
  - Avogadro's number
    - $NA = 6.022 \times 10^{23}$  atoms/mol

$\frac{\$24.49}{1 \text{ roll Al}}$ 
 $\frac{\$0.XXX}{1 \text{ atom}}$

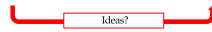

6



**CHEM 1000 Week 4:  
Bonding Overview Questions**

- Questions and issues to be addressed:
  - ✓ Your Questions about Chemical Bonding
  - ✓ A case study in Chemical Bonding

CHEM 1000: Week 4

1

**A Sampling of your questions**

- Questions from you:
  - ✓ Understanding noble gases are stable what makes the valence electrons so attracted?
  - ✓ How does electronegativity work?
  - ✓ Why do ionic compounds form crystal lattices?
  - ✓ How do you know when to remove and add electrons from looking at the periodic table?
  - ✓ How can you tell which atoms have higher bond energies than others?
  - ✓ What is a better way to understand the Coulomb's law equation?

CHEM 1000: Week 4

2

**A Sampling of your questions**

- Questions from you:
  - ✓ Why are polar covalent bonds not equal?
  - ✓ When I think of polar covalent bonds I think of water but water has a dipole moment.
  - ✓ When do you use Lewis structures when figuring out an answer?
  - ✓ How does the octet rule work?

CHEM 1000: Week 4

3

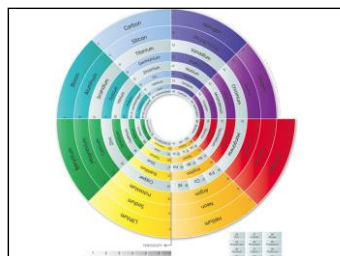

4

**Slides for Part 1 of Case Study**

CHEM 1000: Week 4

5

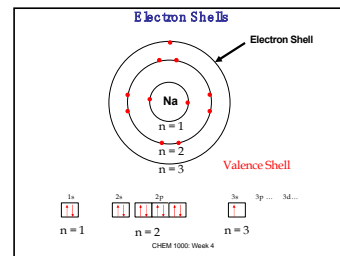

6



**CHEM 1000 Week 5:  
Sticking Together in Chemistry**

- Questions and issues to be addressed:
  - ✓ *Intermolecular Forces*
  - ✓ *Like dissolves like: explaining solubility*
  - ✓ *A case study: Decaffeinating Coffee*
  - ✓ *Weak, but important! Intermolecular Forces in Proteins*
  - ✓ *Q and A time*

CHEM 1000: Week 5

1

**Solutions: Nomenclature**

- Solute:** Component of solution that is present in smallest number of moles
- Solvent:** Component of solution that is present in largest number of moles
- Solubility:** Maximum quantity of substance that can dissolve in a given volume of solution
- Miscible:** Liquids that are mutually soluble in any proportion

CHEM 1000: Week 5

2

**Solubility**

- Solubility depends on relative strength of solute-solvent interactions compared to solute-solute or solvent-solvent.
- Like Dissolves Like:**
  - Ionic/polar solutes will be soluble in polar solvents.
  - Nonpolar solutes will be soluble in nonpolar solvents.

CHEM 1000: Week 5

3

**Like Dissolves Like**

Dissimilar forces = No solution!

CHEM 1000: Week 5

4

**Check-in Question 1**

Which of the following is the most soluble in water?

(a)

(b)

(c)

(d)

CHEM 1000: Week 5

5

**Hydrophobic vs. Hydrophilic**

- Some molecules contain both a polar group and non-polar group
- Hydrophobic** ("water-fearing")
  - interaction that repels water, diminishes water solubility.
- Hydrophilic** ("water-loving")
  - interaction that attracts water, promotes water solubility.

Disperses from water

6



**CHEM 1000 Week 6**

- Questions and issues to be addressed:
  - ✓ *Note-taking strategies in science (and other) classes*
  - ✓ *Note-taking practice: Chemical Reaction Equations and Stoichiometry*
  - ✓ *Lithiations in Chemistry: The Lithiating Reagent*
  - ✓ *A Case Study in Lithiating Reagent*

CHEM 1000: Week 6

1

**Tips for Effective Listening**

- ✓ Sit near the front of the room. Pay attention. Avoid outside distractions and internal noise. Be **focused** rather than **distracted**.
- ✓ Find a reason to listen to the speaker. Ask yourself, "Why is this important?" Be a **willing**, not **reluctant** listener.
- ✓ Listen for more than just facts; try to understand the big picture. Select main ideas. Be **engaged**, not **unengaged**.
- ✓ Anticipate what the speaker is going to say next. Be an **active**, not **passive** listener.
- ✓ Listen first, then write; leave spaces to fill in gaps in your information.
- ✓ **Formulate questions** to ask the instructor in class or in office hours later. Participate.

CHEM 1000: Week 6

2

**Write it down if the speaker...**

- Repeats an item.
- Writes an item on the board or overheads.
- Points or gestures.
- Changes tone or volume of voice.
- Makes a direct reference to the book or external reference.
- Asks if everyone understands. **If you don't understand, ask a question!**
- Gives an example.
- Changes pace (e.g., slows down).

CHEM 1000: Week 6

3

**Note-taking: A checklist**

- **List and look up** unfamiliar terms and concepts.
- **List questions** to ask or points where clarification is needed.
- **Abbreviate**. Put notes into my own words. Keep the notes brief.
- **Number items** and distinguish between major points.
- **Look/listen for word clues** and other ways important concepts are highlighted.
- **Review lecture notes** within twenty-four hours.

CHEM 1000: Week 6

4

**Note-taking: Cornell method**

|                                                                                                                                                                          |                                                                                                                                                                                                                                                                                                                           |
|--------------------------------------------------------------------------------------------------------------------------------------------------------------------------|---------------------------------------------------------------------------------------------------------------------------------------------------------------------------------------------------------------------------------------------------------------------------------------------------------------------------|
| <ul style="list-style-type: none"> <li>Main Idea</li> <li>Central Questions<br/>(after notes are completed)</li> <li>Key Vocabulary</li> <li>Terms to look up</li> </ul> | <ul style="list-style-type: none"> <li>Key ideas/concepts/questions</li> <li>Important dates/events/people</li> <li>Repeated/stressed information</li> <li>Ideas/brainstorming/writing on board</li> <li>Information from textbook or other sources</li> <li>Important formulas</li> <li>Diagrams and pictures</li> </ul> |
|--------------------------------------------------------------------------------------------------------------------------------------------------------------------------|---------------------------------------------------------------------------------------------------------------------------------------------------------------------------------------------------------------------------------------------------------------------------------------------------------------------------|

• Summary of your notes in your own words

CHEM 1000: Week 6

5

**Note-taking with PPT slides**

- If ppt's are distributed before class, print them in notes form.
- Use this to identify key questions and concepts.
- Let's try this!

**Chemical Reaction Equations**







CHEM 1000: Week 6

6



# Module Content Worksheet – CHEM 1000 M1

## MODULE TITLE

The Air that we Breathe

## MODULE OVERVIEW

All living beings have a mechanism for taking and using chemicals from the air – usually for the process of respiration and generation of energy. Thus, every minute of every day our lungs are taking in and breathing out gases.

Have you ever considered what gases you're breathing in and exhaling out? Beyond nitrogen and oxygen, what is the chemical composition of air? What do we mean by “good” air or “bad” air? How do chemists measure and quantify the amount of toxins in our air?

In this module, we will [use the lens of air quality to](#) examine fundamental chemical concepts about the nature of matter and chemical measurement.

We will be able to describe the chemical and physical properties of air, and examine how scientists might define and determine the composition of air. In the process, we will learn how to make and report scientific measurements, distinguishing accuracy and precision. We will explore units of concentration, and perform calculations using unit or dimensional analysis, which is a mathematical tool used throughout chemistry.

[This module will be completed in the first week of the course, broken down as follows. In the first part of the week, you will view short video lectures on the topics, and take notes. You will submit those notes by Wednesday evening. In the later part of the week, you will complete homework, concept map, and case study assignments related to the lecture content. Detailed descriptions on the completion and grading of each assignment are included.](#)

## LEARNING OUTCOMES for Module

- **Classify types of matter, distinguishing between mixtures and pure substances**
- **Distinguish between physical and chemical properties**
- **Demonstrate use of dimensional analysis to solve problems**
- **Use developed guidelines to determine significant figures in numerical measurements, and in calculations**
- **Differentiate between accuracy and precision in measurement**
- **Classify the different units of concentration, and use unit analysis to convert between them**



## List REQUIRED RESOURCES Readings, Lectures, Web Sites,Videos, or Other Sources of Content

- Lectures 1.1 and 1.2
- Case Study: Avogadro Goes to Court

## GRADED ASSIGNMENTS

Graded Assignment 1:  
Submit Notes from Lectures  
Graded on S/U basis using Note-taking Rubric  
8 points  
Due Wednesday of Week 1

Graded Assignment 2:  
Submit Completed Concept Map for Module 1 and Complete Online Discussion  
Graded on S/U basis  
4 points (3 points initial post, 1 point discussion)  
Due at end of Week 1

Graded Assignment 3:  
Complete Module 1 Quiz  
10 points  
Due at end of Week 1

Graded Assignment 4:  
Case Study Assignment  
8 points  
Due at end of Week 1

Total for Week 1: 30 points



## Module Content Worksheet – CHEM 1000 M2

### MODULE TITLE

Of Elements and Earth

### MODULE OVERVIEW

Matter is all around us, in the air we breathe, food we eat, products that we use every day. But what comprises matter? In this module, we will examine atoms, the most fundamental chemical building blocks in nature, and see how these can be combined to make molecules and larger structures such as polymers and plastics.

Using the periodic table as our guide, will examine the sizes and structure of atoms, classify atoms as either metals or non-metals, and distinguish the various types of bonding interactions which connect atoms into larger networks. We will learn how we can represent molecules using Lewis structures, and go from Lewis structures to the 3-dimensional shape of molecules, which is critical for determining the physical and chemical properties of matter.

### LEARNING OUTCOMES for Module

- Discuss periodic trends in properties among the main group elements and their ions using trends in atomic radii, ionization energy, and electron affinity
- Differentiate between ionic, covalent and metallic bonding, comparing and contrasting properties of each
- Compare and contrast properties of metals and non-metals
- Use Lewis structures and Valence Shell Electron Pair repulsion theory to describe the bonding and three-dimensional structure of molecules. Describe periodic trends in ionization energy and electron affinity

### REQUIRED RESOURCES Readings, Lectures, Web Sites, Videos, or Other Sources of Content

- Lectures 2.1, 2.2, 2.3
- Case Study: Chemical Bonding



## GRADED ASSIGNMENTS

### Graded Assignment 1:

Submit Notes from Lectures 2.1-2.3

Graded on S/U basis using Note-taking Rubric

4 points

Due at end of Week 2

### Graded Assignment 2:

Submit a Concept Map for Module 2 on either of the following:

Periodic Trends for Atoms/Ions or Chemical Bonding

Graded on S/U basis

4 points

Due at end of Week 2

### Graded Assignment 3:

Complete Module 2 Problems

10 points

Due at end of Week 2

### Graded Assignment 4:

Post 2 questions/responses to discussion board

2 points

Due at end of Week 2

### Graded Assignment 5:

Case Study Assignment

10 points

Due at end of Week 2

Total for Week 1: 25 points



## Module Content Worksheet – CHEM 1000 M3

### MODULE TITLE

Of Fire and Flame

### MODULE OVERVIEW

Sitting by the campfire on a brisk fall night – that's an activity that anyone can enjoy! Staring into the fire as the logs are consumed, did you ever wonder what chemistry is taking place?

The burning of wood is an example of a **chemical reaction**, where chemical bonds are broken and new ones formed, but the number and type of the atomic building blocks that make up the molecules is conserved. This specific reaction is called a **combustion reaction**, which involves a fuel (such as the wood) reacting with oxygen in the air to make carbon dioxide and water. Combustion reactions generate (or release) energy, and thus are very important types of reactions in our society. We call such reactions **exothermic**.

In this module, we will examine chemical reactions from the viewpoint of combustion. We will learn how to write balanced reaction equations, using combustion reactions as our guide, and determine the limiting reagent in cases where the one reagent is present in excess over another. We will then examine the energy changes in chemical reactions, differentiating between endothermic and exothermic reactions, and examine ways to calculate the energy absorbed or released in chemical reactions.

### LEARNING OUTCOMES for Module

- Write and balance equations for simple chemical reactions, including the physical state of reactant and product
- Differentiate endothermic and exothermic processes, connecting to the first law of thermodynamics
- Define enthalpy, discuss why it is a useful variable for heat transferred in reaction
- Calculate enthalpy changes for reactions using different approaches

### REQUIRED RESOURCES Readings, Lectures, Web Sites, Videos, or Other Sources of Content

- Lectures 3.1, 3.2, 3.3

### GRADED ASSIGNMENTS

Graded Assignment 1:



Submit Notes from Lectures

Graded on S/U basis using Note-taking Rubric

8 points

Due Wednesday of Week 1

Graded Assignment 2:

Submit Completed Concept Maps for Module 3 and Complete Online Discussion

Graded on S/U basis

8 points (6 points initial posts, 2 point discussion)

Due at end of Week 1

Graded Assignment 3:

Complete Module 3 Quiz

10 points

Due at end of Week 1

Total for Week 1: 26 points



## Module Content Worksheet – CHEM 1000 M4

### MODULE TITLE

Water is the Solvent of Life

### MODULE OVERVIEW

Here in the US, we don't think too much about our daily water supply and needs, as nearly 100% of folks in our country have access to clean, safe drinking water. However, this isn't true across the world.

According to the United Nations, 844 million people around the world still lack even basic access to safe drinking water! Unsafe water can lead to diseases like cholera, typhoid and hepatitis A, and, according to the Emergency Event Database and the Netherlands Environmental Assessment Agency, is a bigger cause of human death annually than all disasters and conflict combined. Infants and children are particularly affected.

Water is indeed important, and from a chemical perspective can be considered as the solvent of life. In chemistry, a solvent is a substance which facilitates a chemical reaction by providing a platform for reagents to interact. Water is a critical solvent.

In this module, we will examine the physical properties of water which make it such an important solvent. We will learn that water is polar, and thus can easily solvate polar molecules and ions. We will then examine the properties of aqueous solutions, and examine units of concentration. Closing the module, we will examine important types of reactions which take place in water, along with methods of chemical analysis.

### LEARNING OUTCOMES for Module

- Define intermolecular forces, and connect molecular structure and polarity to types of intermolecular forces
- Describe the uniqueness of the phase diagram for water and connect to the physical and chemical properties of water
- Discuss properties of aqueous solutions and measures of concentration
- Identify important reactions occurring in aqueous solution and methods for chemical analysis

### REQUIRED RESOURCES Readings, Lectures, Web Sites, Videos, or Other Sources of Content

- Lectures 4.1, 4.2, 4.3



## GRADED ASSIGNMENTS

### Graded Assignment 1:

Submit Notes from Lectures

Graded on S/U basis using Note-taking Rubric

8 points

Due Wednesday of Week 4

### Graded Assignment 2:

Submit Completed Concept Maps for Module 3 and Complete Online Discussion

Graded on S/U basis

8 points (6 points initial posts, 2 point discussion)

Due at end of Week 4

### Graded Assignment 3:

Complete Module 4 Quiz

10 points

Due at end of Week 4

Total for Week 4: 26 points
