# Supplementary material for: Design, Evolution, and Evaluation of a General Chemistry-Bridging Course
Source: MDPI journal article supplement (doi:10.3390/educsci13090891), 2023-09-03
Supplement: s1 [file s1]

Archive with 1 entries (1 files):
- education-2544824-supplementary.pdf
